# Supplementary material for: Targeted next generation sequencing with an extended gene panel does not impact variant detection in mitochondrial diseases
Source: Springer Nature journal article supplement (doi:10.1186/s12881-018-0568-y), 2018-04-06
Supplement: MOESM1 [file 15599118]

| Oxydative phosphorylation enzymes                                                                             | Assembly                                                                                                                     | Cofactors                                                                                                                                                           | Enzymes                                                                                                                                                                                                                                                                                                                                                                                                                                                                                                                                                                                                                                                                                                                                                                                                                 | DNA, RNA, and protein synthesis                                                                                                                                                                                                                                                                                                                                                                                                                                                                                                                                 | Homeostasis                                                                                                                                                                                  |
|---------------------------------------------------------------------------------------------------------------|------------------------------------------------------------------------------------------------------------------------------|---------------------------------------------------------------------------------------------------------------------------------------------------------------------|-------------------------------------------------------------------------------------------------------------------------------------------------------------------------------------------------------------------------------------------------------------------------------------------------------------------------------------------------------------------------------------------------------------------------------------------------------------------------------------------------------------------------------------------------------------------------------------------------------------------------------------------------------------------------------------------------------------------------------------------------------------------------------------------------------------------------|-----------------------------------------------------------------------------------------------------------------------------------------------------------------------------------------------------------------------------------------------------------------------------------------------------------------------------------------------------------------------------------------------------------------------------------------------------------------------------------------------------------------------------------------------------------------|----------------------------------------------------------------------------------------------------------------------------------------------------------------------------------------------|
| <b>Complex I</b><br>NDUFA1<br>NDUFA2<br>NDUFA9<br>NDUFA10<br>NDUFA11<br>NDUFA12<br>NDUFB3<br>NDUFB9<br>NDUFS1 | <b>Complex I</b><br>FOXRED1<br>NDUFAF1<br>NDUFAF2<br>NDUFAF3<br>NDUFAF4<br>NDUFAF5<br>NDUFAF6<br><b>Complex II</b><br>SDHAF1 | <b>FeS clusters</b><br>BOLA3<br>NUBPL<br>FDX1L<br>FXN<br>GLRX5<br>IBA57<br>ISCU<br>LYRM4<br>NFU1                                                                    | <b>Fatty acid oxydation</b><br>ACAD8<br>ACAD9<br>ACADM<br>ACADS<br>ACADSB<br>ACADVL<br>ETFB<br><b>Krebs cycle</b><br>ACO2<br>PC                                                                                                                                                                                                                                                                                                                                                                                                                                                                                                                                                                                                                                                                                         | <b>Replication</b><br>DNA2<br>MGME1<br>POLG<br>POLG2<br>RMRP<br>TWNK<br><b>Nucleotides</b><br>DGUOK<br>MPV17                                                                                                                                                                                                                                                                                                                                                                                                                                                    | <b>Protein Import</b><br>AIFM1<br>GFER<br>XPNPEP3<br><b>Transporter</b><br>ABCB7<br>DNAJC19<br>MPC1<br>SLC19A2<br>SLC19A3<br>SLC22A5<br>SLC25A1<br>SLC25A12<br>SLC25A13                      |
| SDHA<br>SDHB<br>SDHC<br>SDHD                                                                                  | <b>Complex II</b><br>SDHAF2<br><b>Complex III</b><br>BCS1L<br>TTC19<br><b>Cytochrome c oxidase</b><br>CEP89<br>COA5          | <b>Cu</b><br>SCO1<br>SCO2<br><b>Coenzyme A</b><br>COASY<br>PANK2                                                                                                    | <b>FDH</b><br>FH<br>MDH2<br><b>Ketone bodies</b><br>ACAT1<br>HMGCL<br>HMGCS2                                                                                                                                                                                                                                                                                                                                                                                                                                                                                                                                                                                                                                                                                                                                            | <b>PC</b><br>PCCA<br>PCCB<br>PCK2<br><b>RNA metabolism</b><br>ELAC2<br>HSD17B10<br>MTPAP<br>LRPPRC<br>MTO1<br>PNPT1<br>PUS1<br>TRMU<br><b>Translation regulation</b><br>GFM1<br>C12orf65<br>RMND1<br>TSFM<br>TUFM                                                                                                                                                                                                                                                                                                                                               | <b>SLC25A2</b><br>SLC25A3<br>SLC25A38<br>SLC25A4<br>SUCLA2<br>SUCLG1<br>TK2<br>TYMP<br>CLPP<br>SACS<br>HSPD1<br>SPG7<br>HTRA2<br><b>Fission and fusion</b><br>DNM1L<br>MFN2<br>GDAP1<br>OPA1 |
| <b>Complex III</b><br>CYC1<br>UQCRCB<br>UQCRC2<br>UQCRCQ                                                      | COX10<br>COX14<br>COX15<br>COX20<br>PET100<br>SURF1<br><b>ATP synthase</b><br>ATPAF2<br>TMEM70                               | <b>Biotin</b><br>BTBD<br>HLCS<br><b>Heme</b><br>ALAS2<br>PPOX<br>CYCS<br>HCCS<br><b>Thiamine</b><br>TPK1<br><b>Lipoic Acid</b><br>LIAS<br>DLD<br><b>Fe</b><br>SFXN4 | <b>Coenzyme Q</b><br>COQ2<br>COQ9<br>COQ6<br>PDSS1<br>COQ8A<br>PDSS2<br>COQ8B<br><b>Pyruvate dehydrogenase</b><br>DLAT<br>PDHX<br>PDHA1<br>PDK3<br>PDHB<br>PDP1<br><b>Aldehyde dehydrogenase</b><br>ALDH4A1<br>ALDH6A1<br><b>Others</b><br>AK2<br>GK<br>AMACR<br>GLDC<br>AMT<br>GLUD1<br>ATL1<br>HIBCH<br>AUH<br>HK1<br>BCAT2<br>HOGA1<br>BCKDHA<br>IDH1<br>BCKDHB<br>IDH2<br>CPS1<br>IVD<br>CRAT<br>L2HGDH<br>CYB5R3<br>MAOA<br>FARS2<br>CYP27A1<br>MCCC1<br>GARS<br>DDHD1<br>MCCC2<br>HARS2<br>D2HGDH<br>MCEE<br>KARS<br>DBT<br>MLYCD<br>LARS2<br>DECR1<br>MMAA<br>MARS2<br>DHODH<br>MMAB<br>MTFMT<br>DMGDH<br>MMADHC<br>RARS2<br>ETHE1<br>MUT<br>SARS2<br>FASTKD2<br>NAGS<br>YARS2<br>FBP1<br>OAT<br>Repair<br>GAMT<br>OGDH<br>ERCC6<br>GATM<br>OTC<br>APTX<br>GCDH<br>OXCT1<br>UNG<br>GCK<br>PNPLA2<br>GCSH<br>WVOX | <b>Protein quality</b><br>AFG3L2<br>PARK2<br>CLPP<br>SACS<br>HSPD1<br>SPG7<br>HTRA2<br><b>Lipid</b><br>AGK<br>SERAC1<br>TAZ<br><b>MICOS</b><br>CHCHD10<br><b>Ca2+</b><br>CISD2<br>WFS1<br><b>Trafficking</b><br>KIF5A<br>KIF1B<br>SPG20<br><b>Apoptosis</b><br>DIABLO<br><b>Unclear function</b><br>OPA3<br>SAMHD1<br>PNKD<br>SPAST<br>PARK7<br>STAR<br>PINK1<br>TMEM126A<br>REEP1<br>YWHAE<br><b>Candidate genes</b><br>CHCHD3<br>KIF13A<br>CHCHD4<br>MFN1<br>CHCHD6<br>MINOS1<br>ECHS1<br>PACS2<br>FBXL4<br>PIF1<br>FIS1<br>SUCLG2<br>GTPBP3<br>SYNE1<br>IMMT |                                                                                                                                                                                              |
| ATP5A1<br>ATP5E                                                                                               |                                                                                                                              |                                                                                                                                                                     |                                                                                                                                                                                                                                                                                                                                                                                                                                                                                                                                                                                                                                                                                                                                                                                                                         |                                                                                                                                                                                                                                                                                                                                                                                                                                                                                                                                                                 |                                                                                                                                                                                              |
